# Supplementary material
Source: publisher figshare collection journal article supplement (https://acs.figshare.com/ndownloader/files/14245235)
Supplement: Supplementary file 1 [file 14245235]

## SUPPORTING INFORMATION

### **Inhibition of LTP-induced translation by IL-1 $\beta$ reduces the level of newly synthesized proteins in hippocampal dendrites**

G. Aleph Prieto<sup>1\*</sup>, Erica D. Smith<sup>1</sup>, Liqi Tong<sup>1</sup>, Michelle Nguyen<sup>1</sup>, Carl W. Cotman<sup>1,2</sup>

<sup>1</sup>Institute for Memory Impairments and Neurological Disorders, University of  
California-Irvine, Irvine, CA 92697 USA

<sup>2</sup>Department of Neurobiology and Behavior, University of California-Irvine,  
Irvine, CA 92697 USA

FIGURE S1

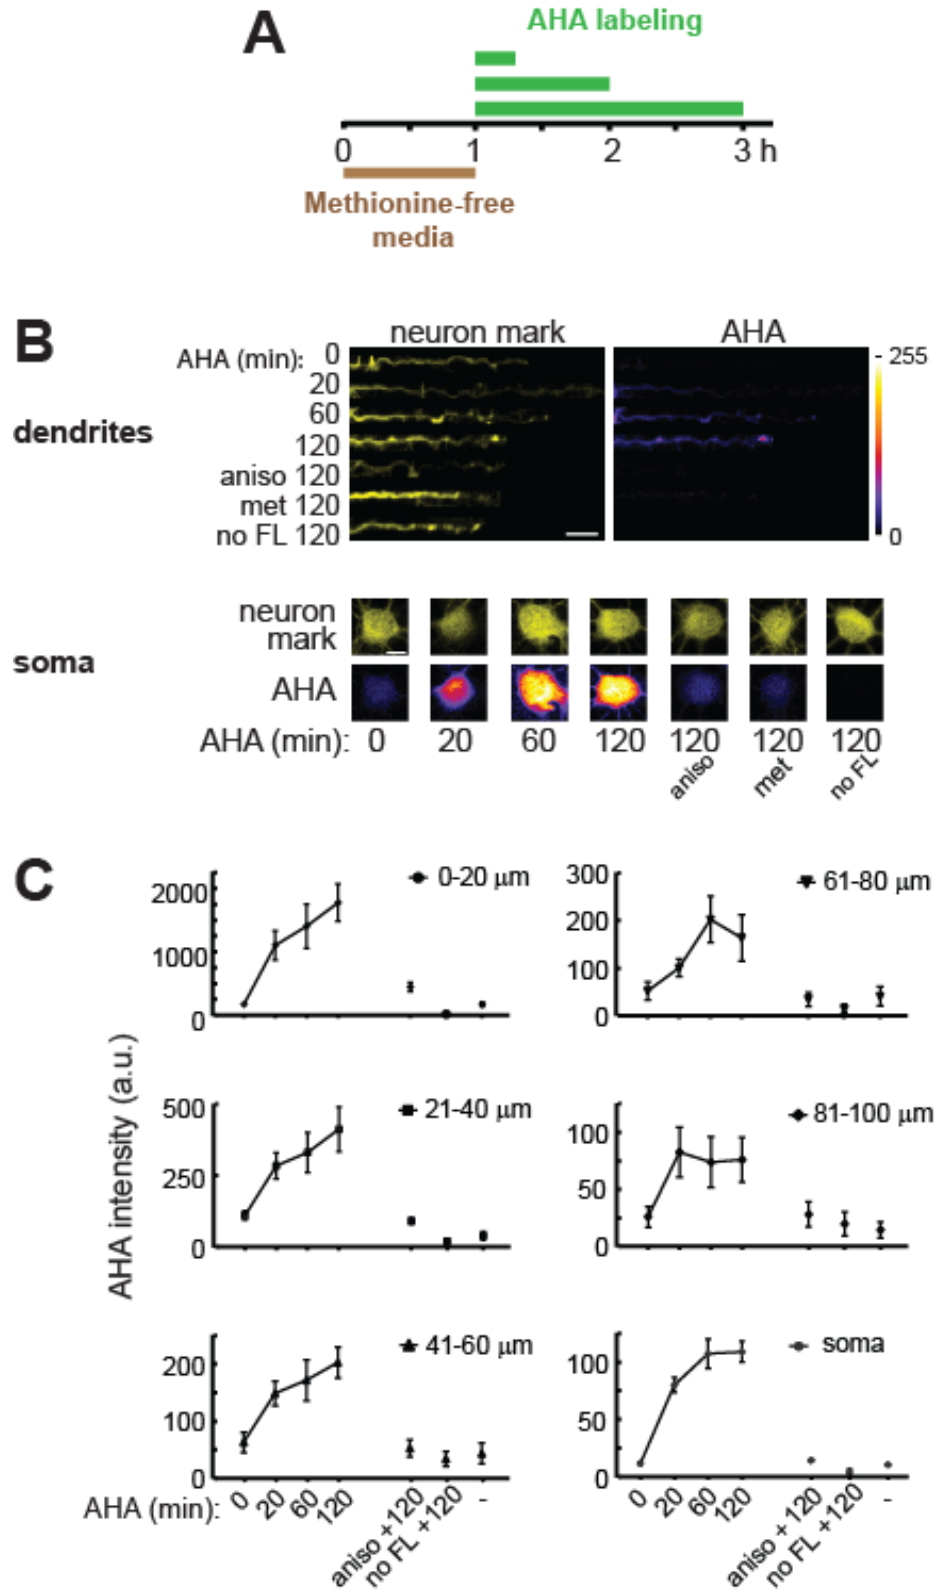

Figure S1. Quantification of newly-synthesized proteins by click-chemistry at 20, 60 and 120 min. Outline of the experiment (A). Neuron cultures incubated for the time points indicated with 2  $\mu$ M AHA, 2 mM methionine (Met), 2  $\mu$ M AHA in the presence of 40  $\mu$ M anisomycin (aniso), or 2  $\mu$ M AHA without fluorescent tag during cycloaddition reaction (no FL). Representative straightened dendrites (left, proximal; right, distal) and soma for time points and treatments indicated; scale bars 20 and 10  $\mu$ m, for dendrites and soma, respectively. Representative examples are shown (B). Mean AHA intensities  $\pm$  s.e.m. of the dendrites in 20- $\mu$ m bins; per time point, data from 14–22 dendrites were analyzed. Mean AHA intensities  $\pm$  s.e.m. of the somata; per time point, data from 17–32 cells was collected and analyzed using ImageJ. Note the differences in the Y-axis scale on plots (C).
